# Supplementary material for: Study on Extraction and Purification of Acanthopanax senticosus Polyphenols by an Ionic Liquid-Assisted Aqueous Two-Phase System
Source: MDPI journal article supplement (doi:10.3390/molecules28176383), 2023-08-31
Supplement: s1 [file s1]

# Study on Extraction and Purification of *Acanthopanax senticosus* Polyphenols by an Ionic Liquid-assisted Aqueous Two-phase System

Ying Li <sup>1</sup>, Xiaoli Li <sup>2</sup>, Xueyan Wang <sup>3</sup>, Jiaojiao Xue <sup>4</sup>, Rui Zhang <sup>5</sup>, Yi Ding <sup>6</sup>, Xiuling Chu <sup>2,\*</sup> and Jianqing Su <sup>2,\*</sup>

<sup>1</sup>Shandong Provincial Institute of Chinese Veterinary Medicine, Liaocheng University, Liaocheng 252000, China

\*Correspondence: chuxiul@163.com (X.C.); sujianqing@lcu.edu.cn (J.S.)

## Supporting Information

Table S1. Ionic liquids and solubility.

| ILs number | Abbreviation           | Full name                                             | Solubility in water |
|------------|------------------------|-------------------------------------------------------|---------------------|
| IL1        | [C4mim]Cl              | 1-Butyl-3-methylimidazole chloride                    | Totally miscible    |
| IL2        | [C4mim]Br              | 1-Butyl-3-methylimidazolium bromide                   | Totally miscible    |
| IL3        | [C4mim]BF <sub>4</sub> | 1-Butyl-3-methylimidazole tetrafluoroborate           | Totally miscible    |
| IL4        | [BMIM]OTf              | 1-Butyl-3-methylimidazolium trifluoromethanesulfonate | Totally miscible    |
| IL5        | [BMIM]SO <sub>4</sub>  | 1-Butyl-3-methylimidazolium hydrogen sulfate          | Totally miscible    |
| IL6        | [HMIM]Cl               | 1-Hexyl-3-methylimidazolium chloride                  | Totally miscible    |
| IL7        | [HMIM]BF <sub>4</sub>  | 1-Hexyl-3-methylimidazolium tetrafluoroborate         | Totally miscible    |
| IL8        | [OMIM]BF <sub>4</sub>  | 1-Octyl-3-methylimidazolium tetrafluoroborate         | Totally miscible    |
| IL9        | [OMIM]Br               | 1-Octyl-3-methylimidazolium Bromide                   | Totally miscible    |

we have conducted experiments on the solubility of ionic liquids: an amount of alcohol, water, ionic liquid was added that the mass fraction of ethanol was 32 wt. %, the mass fraction of the ionic liquid was 3, 5, 7, 9, 11, and 13 wt.%, and the total volume is 10 mL, stir at room temperature to form a homogeneous and transparent solution, which will not crystallize when stored at room temperature for 24h.

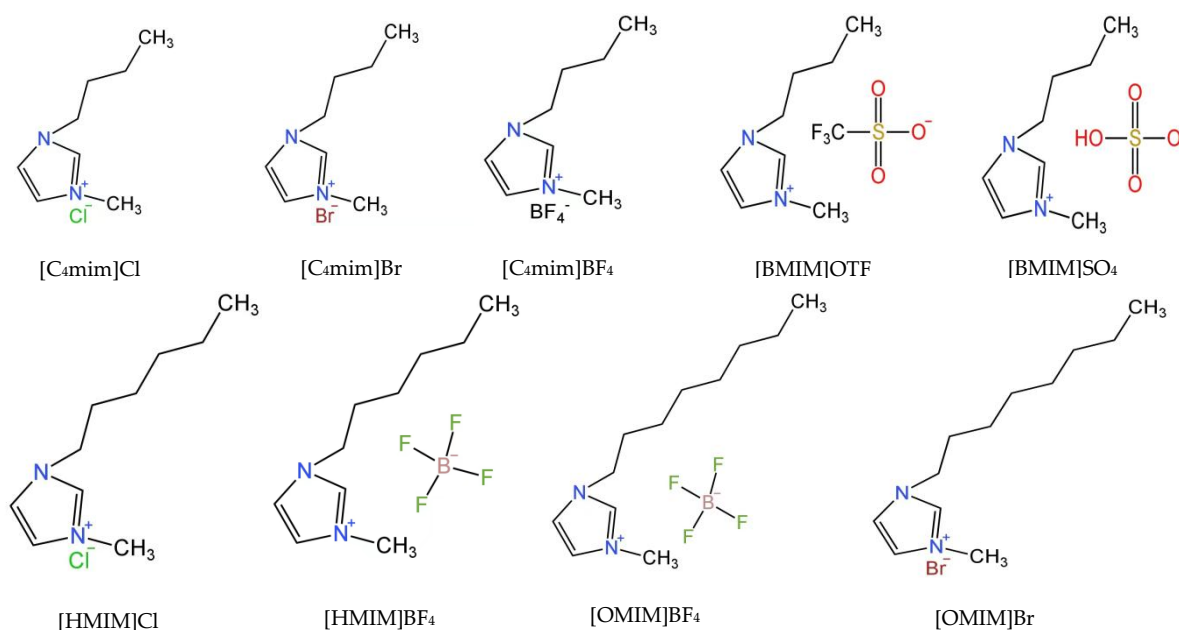

Figure S1. Different structural formulas of ionic liquids.

**Table S2.** Adsorption isotherm models fitting regression equations and adsorption parameters at different temperatures.

| Model      | T/(° C) | Equation                         | Parameter                                |                     |        |
|------------|---------|----------------------------------|------------------------------------------|---------------------|--------|
|            |         |                                  | $K_f[(\text{mg/g})(\text{mL/mg})^{1/n}]$ | n                   | $R^2$  |
| Freundlich | 25      | $\ln C_e = 0.9465C_e + 2.7249$   | 15.2549                                  | 1.0565              | 0.9295 |
|            | 30      | $\ln C_e = 0.9619C_e + 2.9205$   | 18.5506                                  | 1.0396              | 0.9817 |
|            | 37      | $\ln C_e = 0.9854C_e + 2.7726$   | 16.0000                                  | 1.0148              | 0.9853 |
| Langmuir   |         |                                  | $k_L(\text{mL/mg})$                      | $Q_m(\text{mg/g})$  | $R^2$  |
|            |         |                                  | 0.1469                                   | 118.4210            | 0.3913 |
|            |         |                                  | 0.1022                                   | 200.0000            | 0.5241 |
| Temkin     | 25      | $C_e/q_e = 0.084C_e + 0.0575$    | 0.0749                                   | 243.2432            | 0.2781 |
|            | 30      | $C_e/q_e = 0.0050C_e + 0.0489$   |                                          |                     |        |
|            | 37      | $C_e/q_e = 0.0041C_e + 0.0549$   |                                          |                     |        |
| Temkin     |         |                                  | $K_T(\text{L/mg})$                       | $B_T(\text{J/mol})$ | $R^2$  |
|            |         |                                  | 13.3631                                  | 5.9448              | 0.935  |
|            |         |                                  | 13.3178                                  | 7.0687              | 0.9358 |
|            | 35      | $q_e = 6.2555 \ln C_e + 16.1042$ | 13.1234                                  | 6.2555              | 0.9073 |

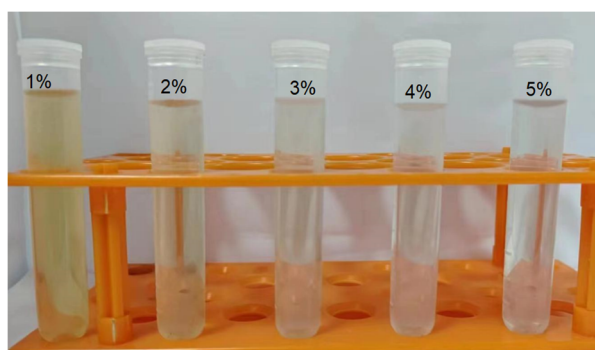

**Figure S2.** Decolorization effect of activated carbon.

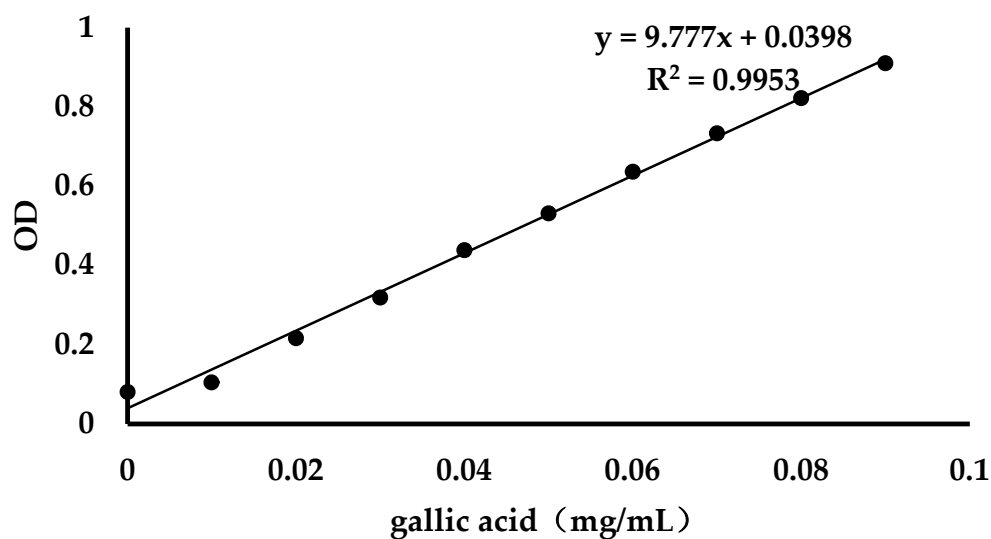

**Figure S3.** Standard curve for polyphenol content.
